# Supplementary material
Source: Research Square preprint supplement (doi:10.21203/rs.3.rs-9180491/v1)
Supplement: Supplementary file 1 [file 59bda202f06fac2727513b09.docx]

**Supplementary Information I**

An alternative estimate of the average grain size can be derived from x-ray diffraction peak widths using the Debye-Scherer equation:

where *K* is the shape factor (typically 0.9), 𝜆 = 0.1541 nm (Cu *K*𝛼 x-ray wavelength), 𝛽 = full-width at half-maximum, and 𝜃 the Bragg diffraction angle.

For example, the (111) peak in Figure 3 has a full-width at half-maximum of 0.51º, corresponding to an average grain size of 17 nm. This number appears to agree with the line-of-intercept estimate of the grain size, but such “agreement” warrants clarification. First, since the Debye-Scherer equation measures the coherent domain size (not grain size) and does not include contributions from instrument broadening and strain gradient, the actual coherent domain size is larger than 17 nm. Second, in the Bragg-Brentano configuration, x-ray diffraction probes the coherent domain size along the direction normal to the film surface. If each NiCr nanolayer (8.0 ± 1.6 nm) were crystallographically independent, the extracted “grain size” would be expected to approach the individual layer thickness. The substantially larger value obtained here demonstrates that the NiCr grains diffract coherently across two or more successive NiCr layers. This behavior is fully consistent with the formation of ultrathin (1.0 ± 0.2 nm) Mo layers that are coherent with NiCr along specific crystallographic directions.

**Supplementary Information II**

For a periodic multilayer coating system with period *L*, the normal Bragg equation is:

(1)

where 𝜃 = angle of incidence relative to the surface, *n* the diffraction order, and 𝜆 the x-ray wavelength. At sufficiently small angles, we have to consider refraction of x-rays as the refractive index 𝜇 for x-rays is slightly less than unity, i.e., . Two modifications must be made to the Bragg equation. First, the actual angle of incidence to the second and subsequent layers of the coating should be replaced by 𝜃’, which is given by the Snell’s law:

(2)

Second, the x-ray wavelength within the coating 𝜆’ is equal to 𝜆/(1 – 𝛿).

Now take the square of equation (2):

Solve for

(3)

Rewrite the new Bragg equation from equation (1):

(4)

Take the square of equation (4) and substitute the expression for from equation (3):

Multiply the above equation by

Simplifying and approximating by , we have:
